# Supplementary material for: HeLa cell response proteome alterations induced by mammalian reovirus T3D infection
Source: PubMed Central journal article supplement (PMC3847587; doi:10.1186/1743-422x-10-202), 2013-06-21
Supplement: 1743-422X-10-202-S1.pdf [file 1743-422X-10-202-S1.pdf]

## Supplementary Figure S1

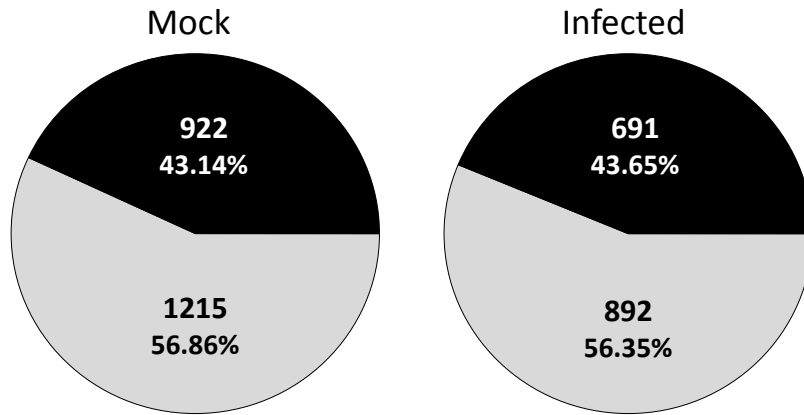

**Figure S1.** Gene ontology distribution of light-labeled proteins in indicated samples collected at 24hpi from Mock- and T3D-infected HeLa cells; , nuclear-annotated proteins; , non-nuclear-annotated proteins. Total numbers of proteins and percentages indicated within each pie section.

# Supplementary Figure S2. Top-ranked Ingenuity Canonical Pathways

| Ingenuity Canonical Pathway                                                  | $-\log(p\text{-value})$ |
|------------------------------------------------------------------------------|-------------------------|
| Interferon Signaling (see Fig. 5)                                            | 6.05E00                 |
| Glycogen Degradation II                                                      | 3.97E00                 |
| PDGF Signaling                                                               | 3.96E00                 |
| Glycogen Degradation III                                                     | 3.71E00                 |
| Role of Pattern Recognition Receptors in Recognition of Bacteria and Viruses | 3.56E00                 |
| Antigen Presentation Pathway                                                 | 3.33E00                 |
| Prolactin Signaling                                                          | 3.12E00                 |
| Protein Ubiquitination Pathway                                               | 3.03E00                 |
| EGF Signaling                                                                | 2.97E00                 |
| Thrombopoietin Signaling                                                     | 2.68E00                 |
| Glioma Invasiveness Signaling                                                | 2.62E00                 |
| T Cell Receptor Signaling                                                    | 2.59E00                 |
| Activation of IRF by Cytosolic Pattern Recognition Receptors                 | 2.54E00                 |

## Supplementary Figure S2-A: Glycogen degradation II

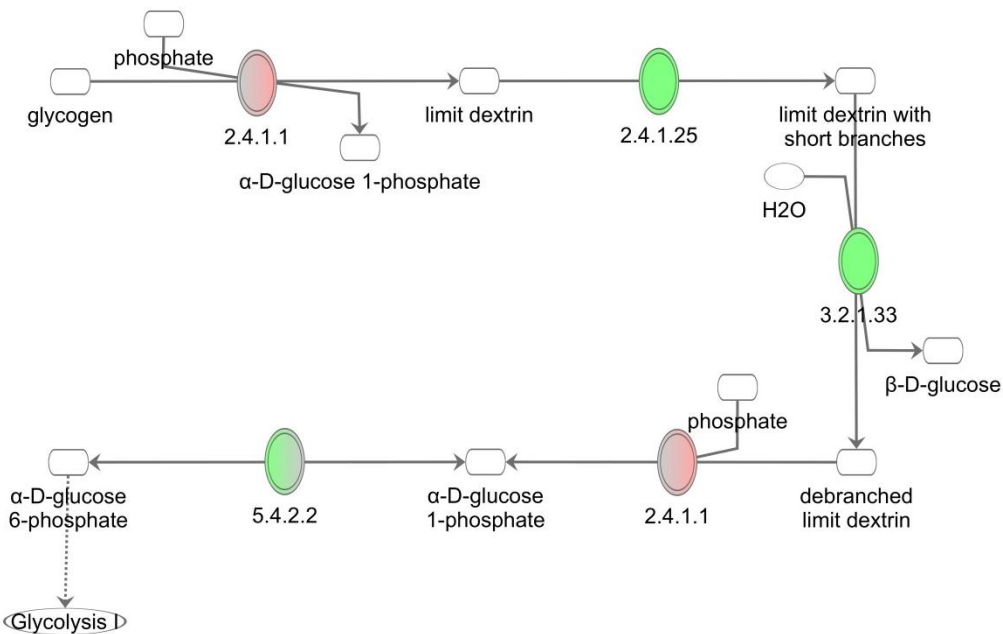

- Complex
- Cytokine/Growth Factor
- Enzyme
- G-protein Coupled Receptor
- Group/Complex/Other
- Growth factor
- Ion Channel
- Kinase
- Ligand-dependent Nuclear Receptor
- Peptidase
- Phosphatase
- Transcription Regulator
- Translation Regulator
- Transmembrane Receptor
- Transporter
- Unknown
- Micro RNA
- Relationship
- Relationship

Supplementary Figure S2-B: PDGF signaling

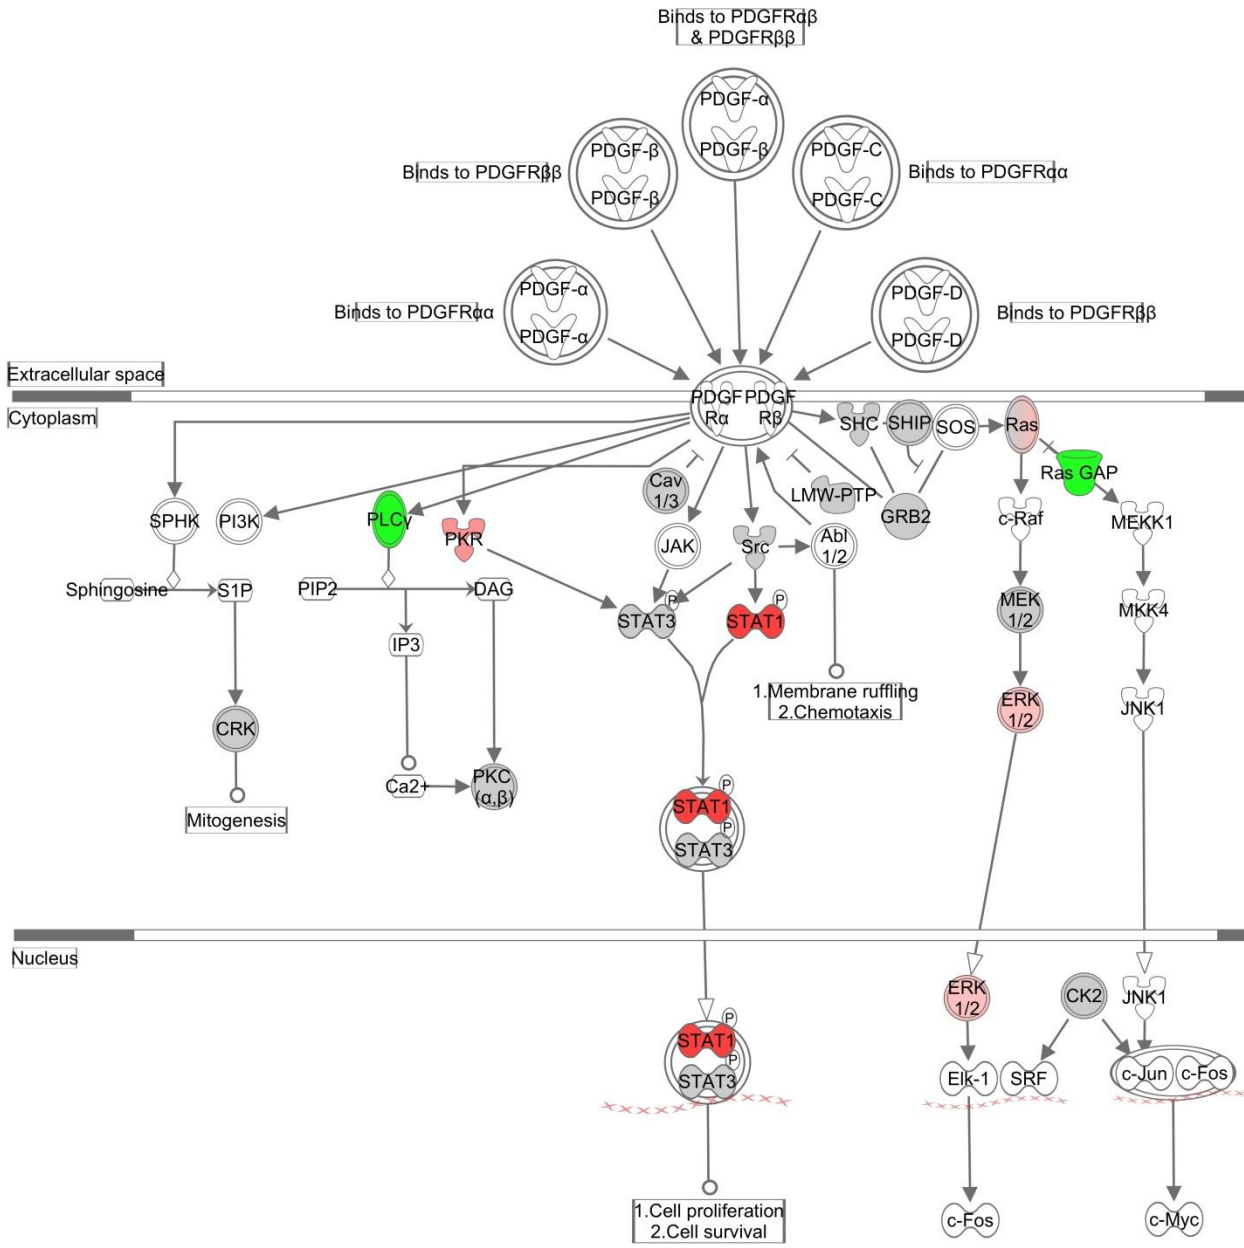

Supplementary Figure S2-C: Glycogen degradation III

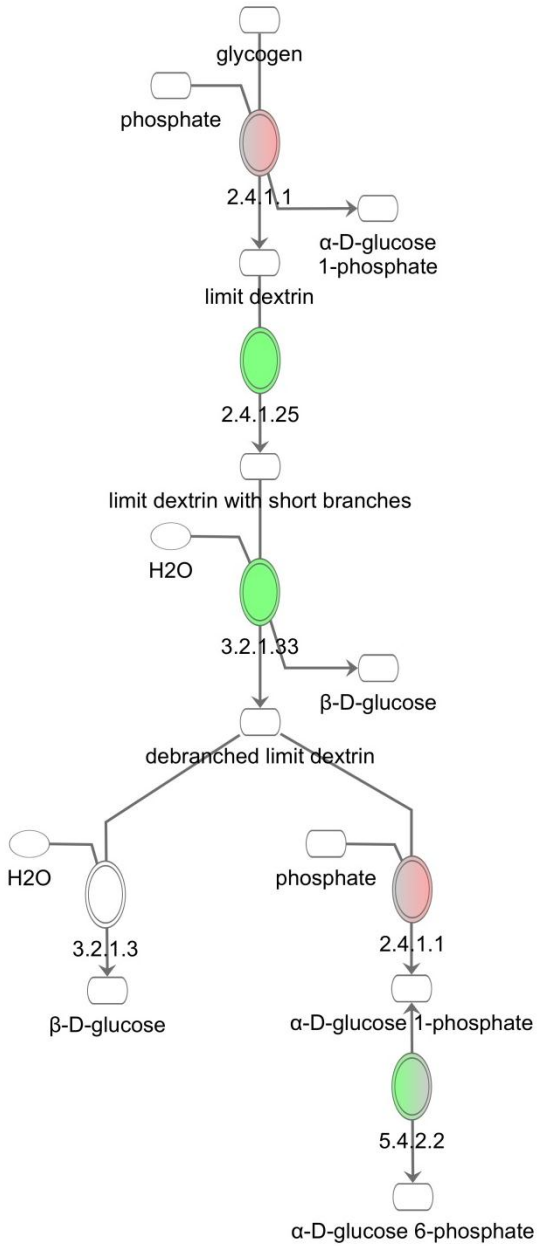

# Supplementary Figure S2-D: Role of pattern recognition receptors in recognition of bacteria and viruses

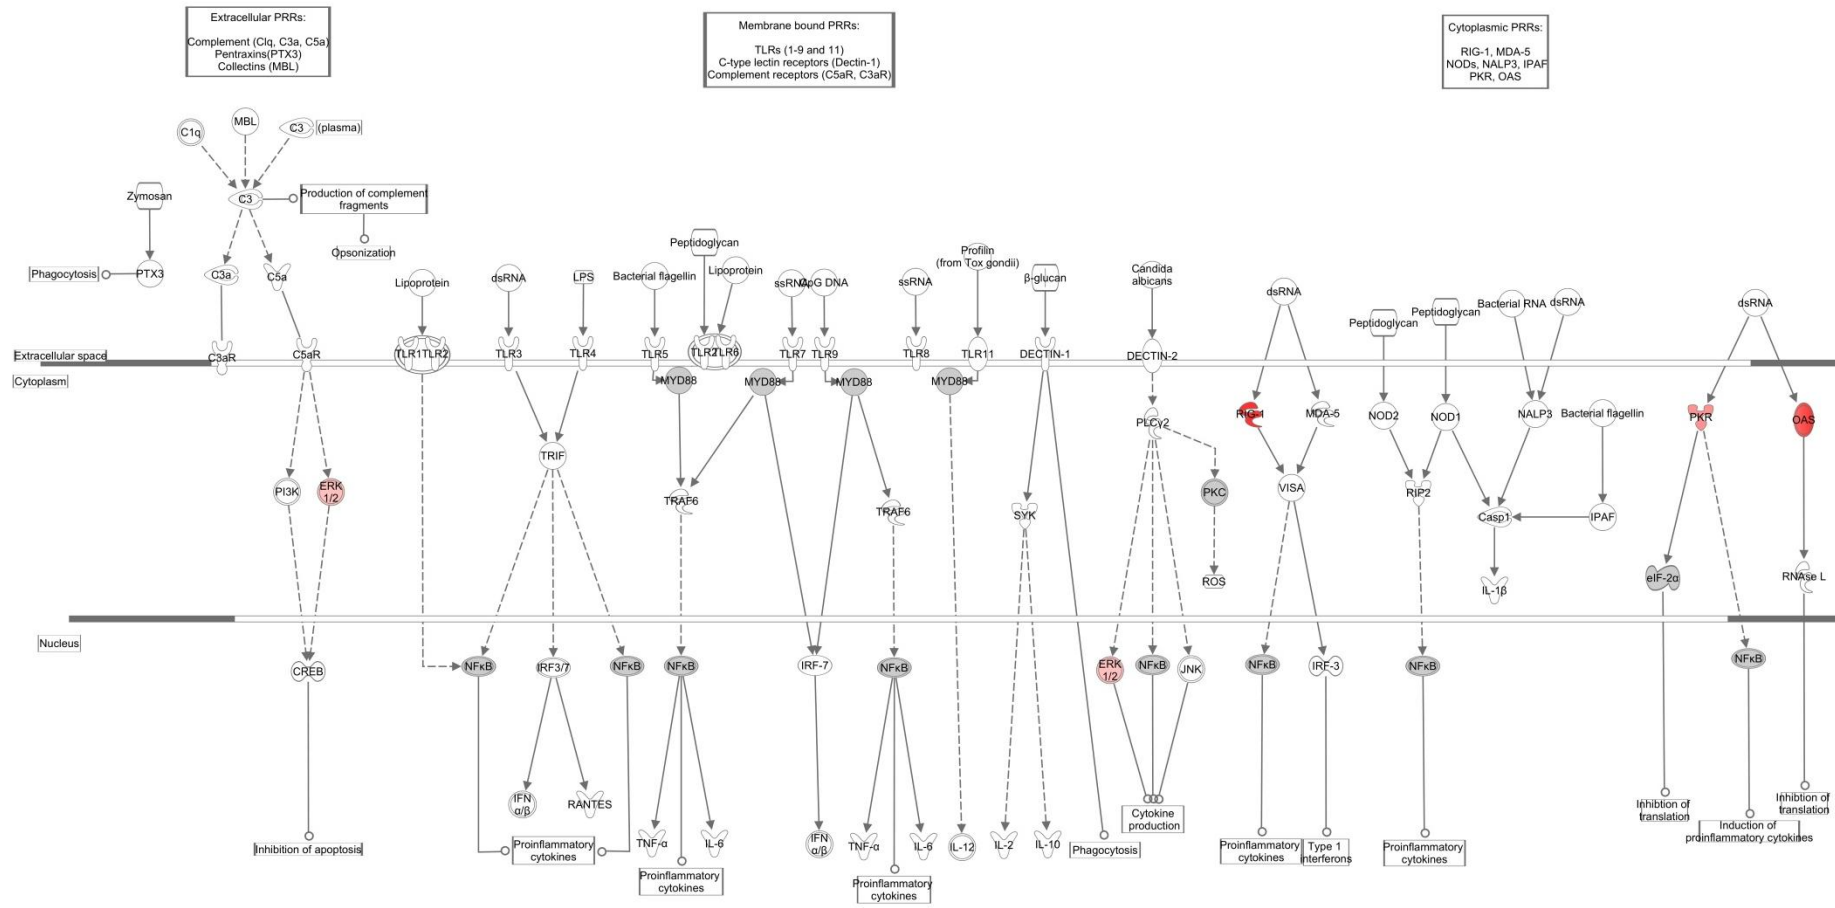

# Supplementary Figure S2-E: Antigen presentation pathway

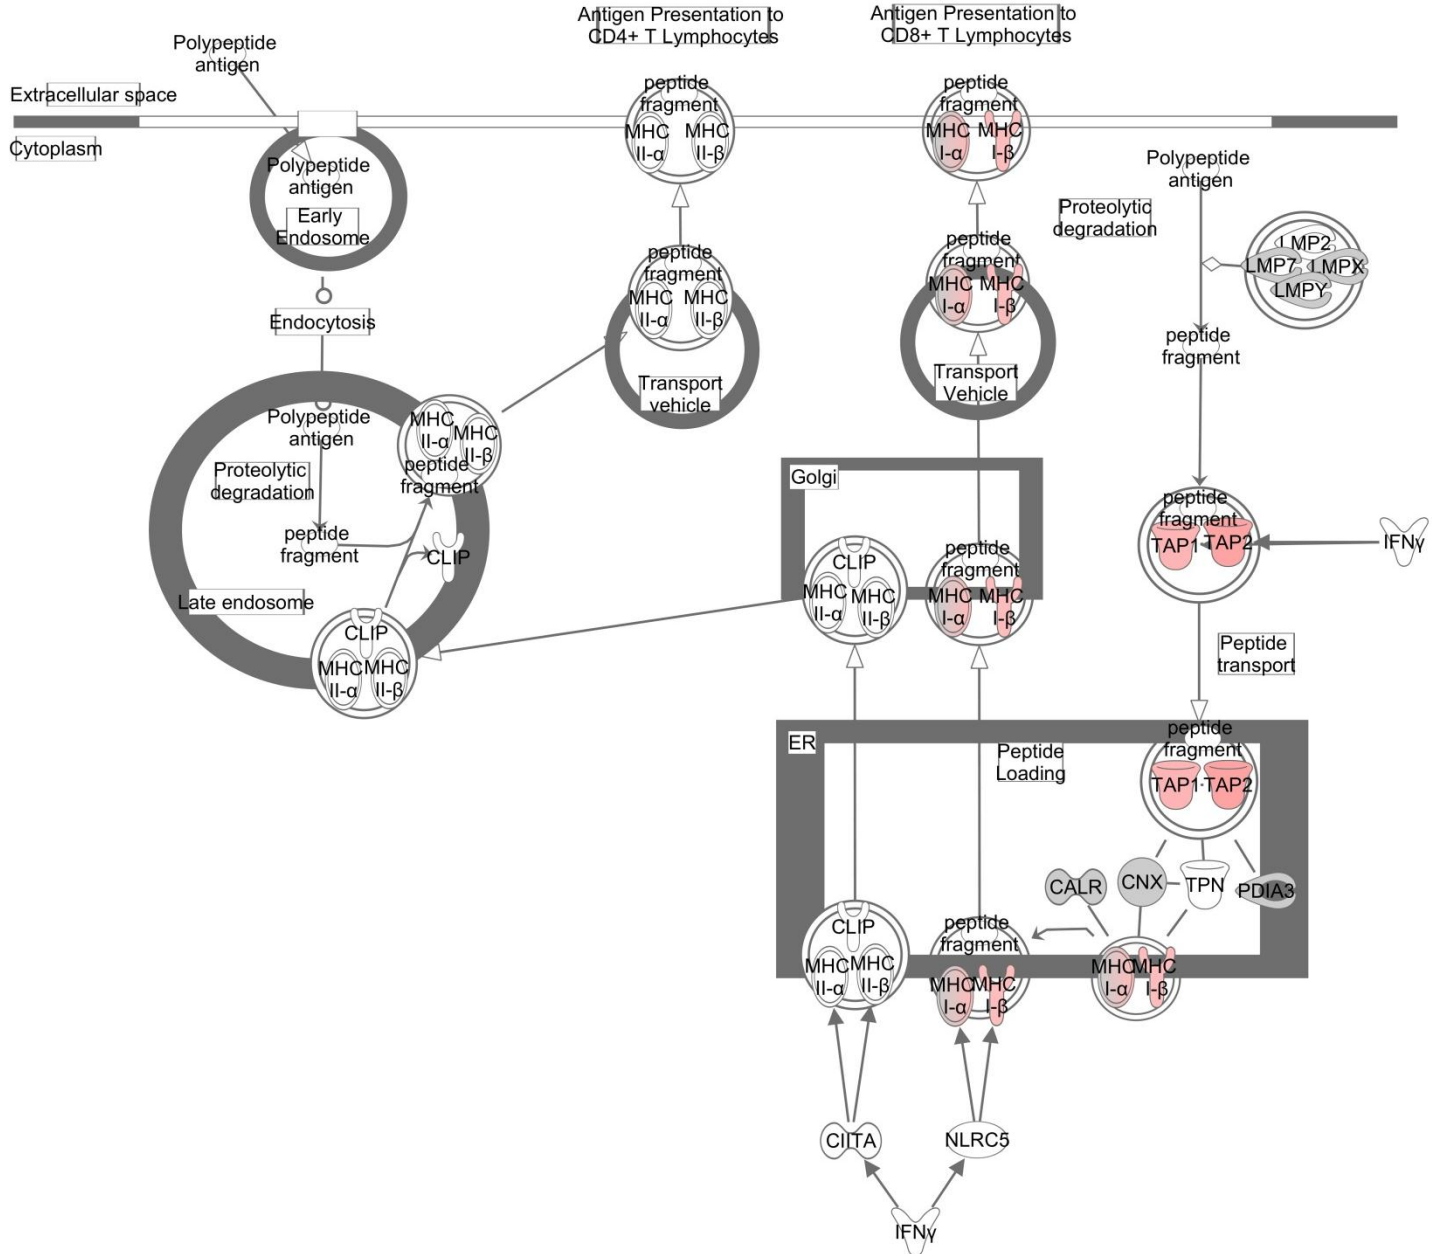

**Supplementary Figure S2-F: Prolactin signaling**

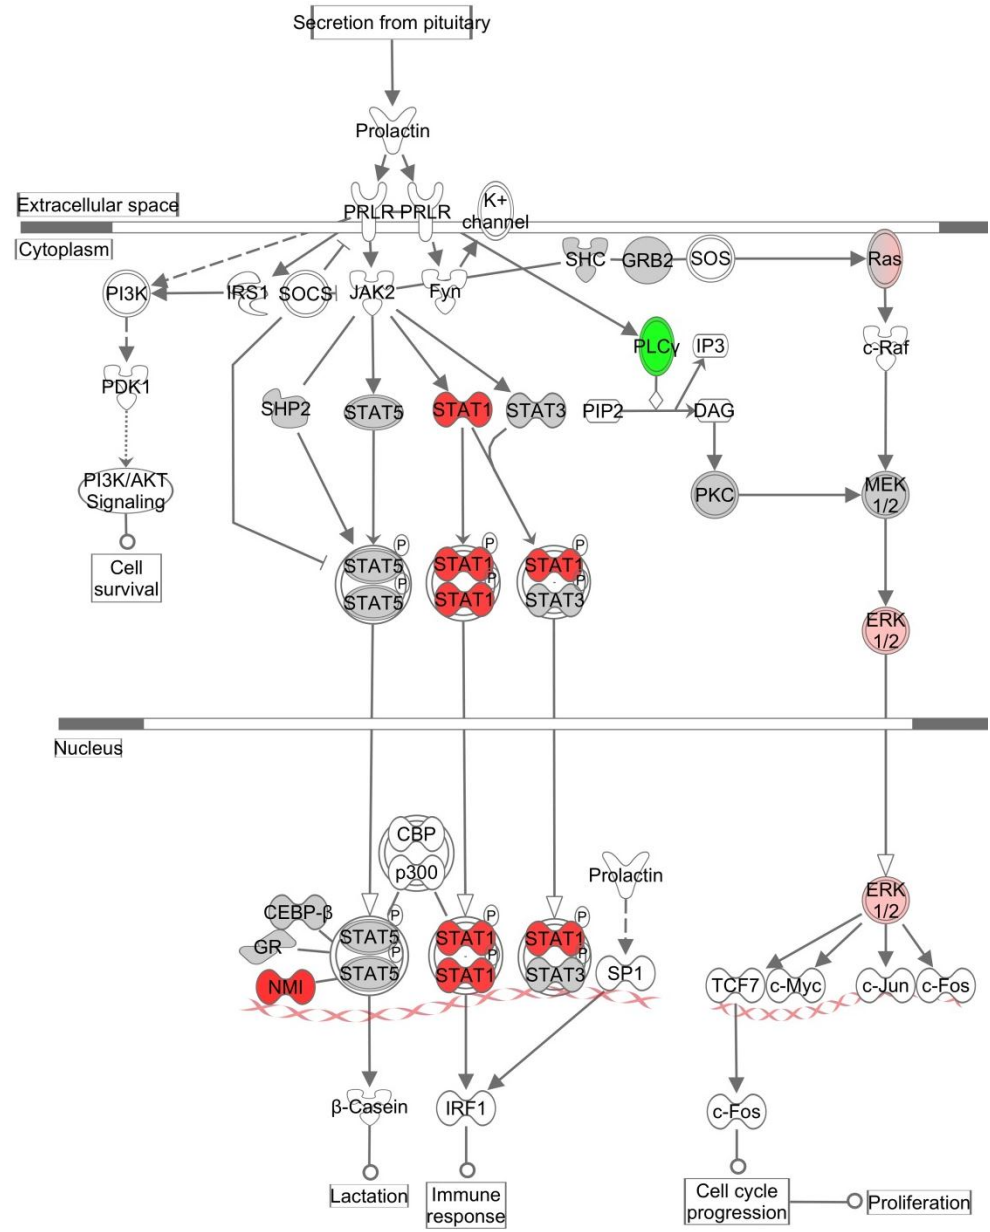

# Supplementary Figure S2-G: Protein ubiquitination pathway

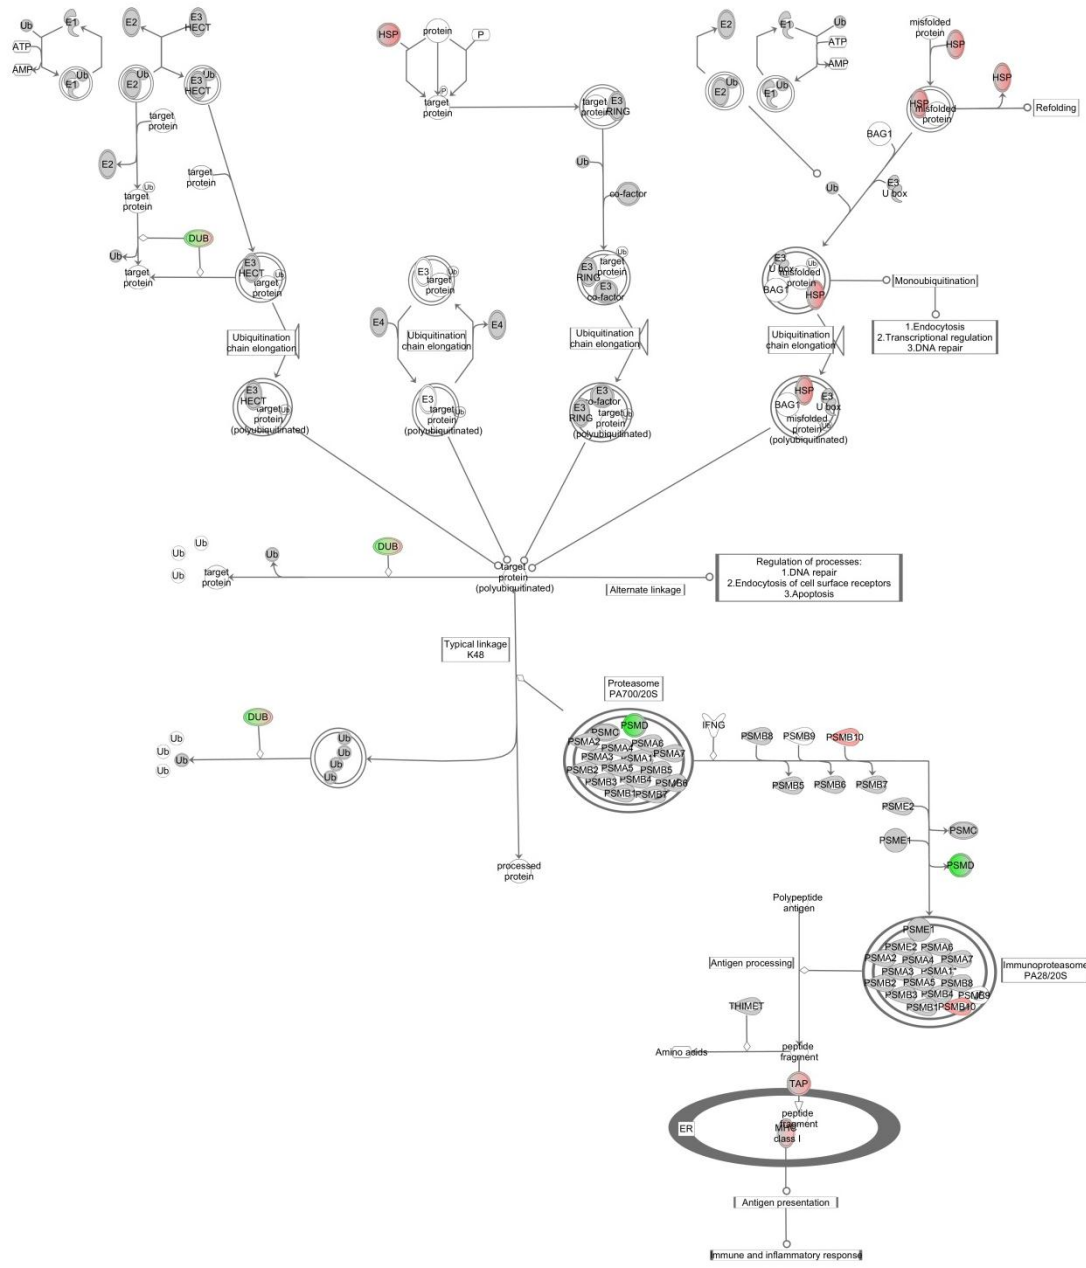



**Supplementary Figure S2-H: EGF signaling**

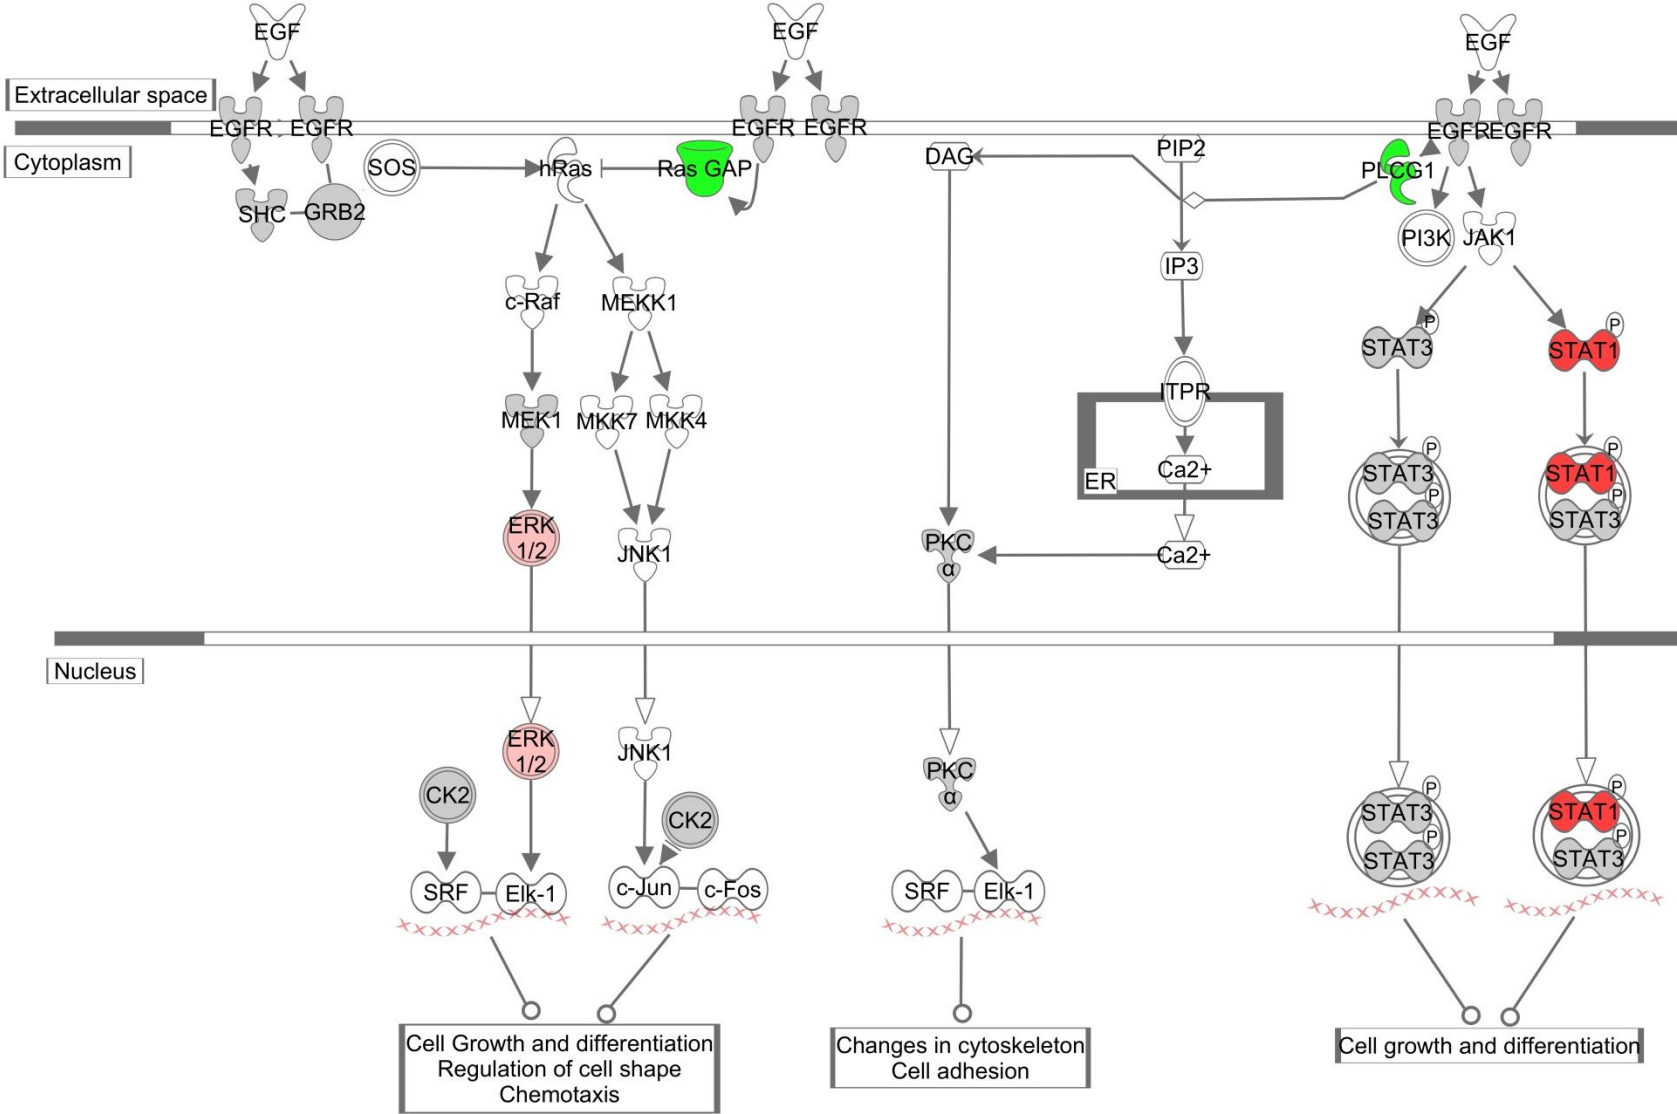

Supplementary Figure S2-I: Thrombopoietin signaling

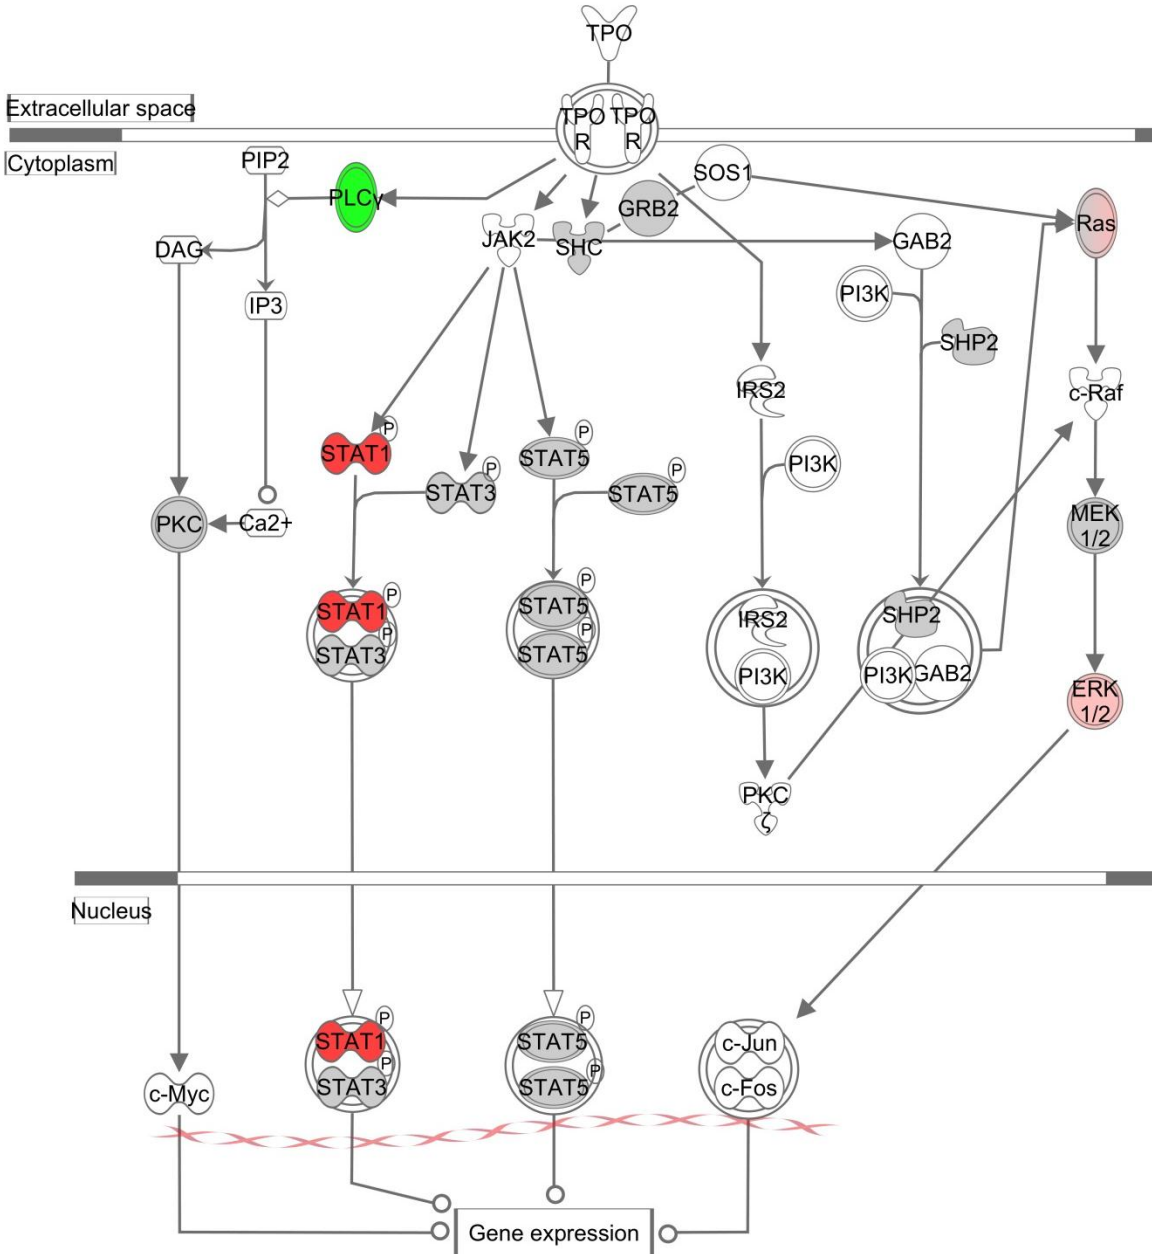

**Supplementary Figure S2-J: Glioma invasiveness signaling**

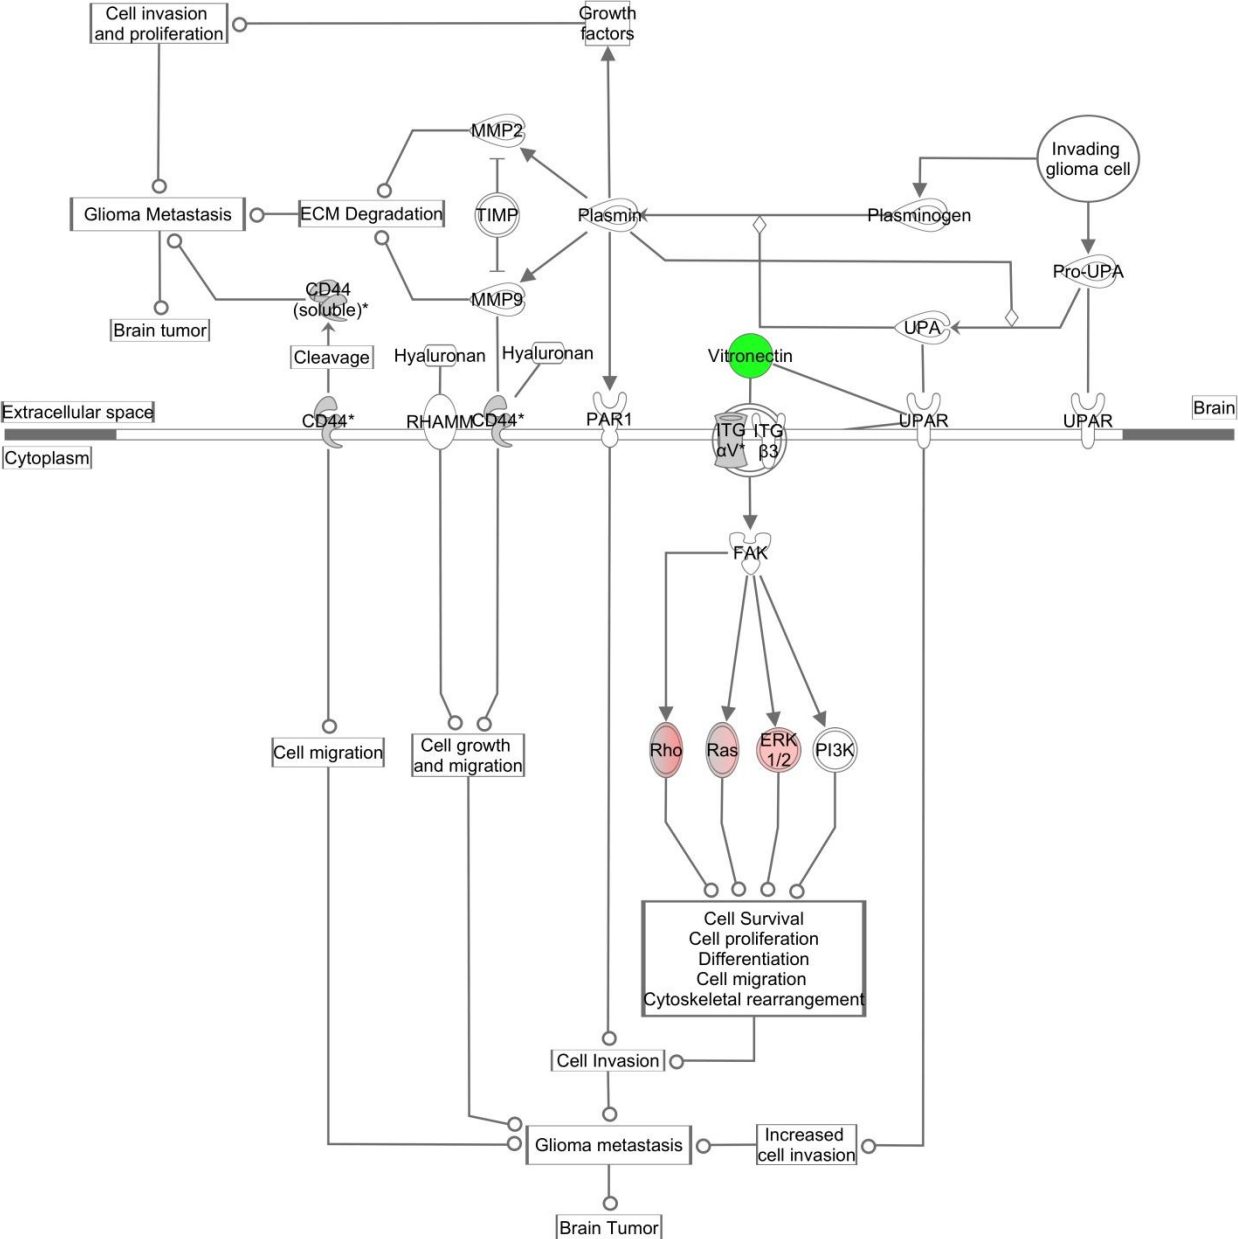

Supplementary Figure S2-K: T cell receptor signaling

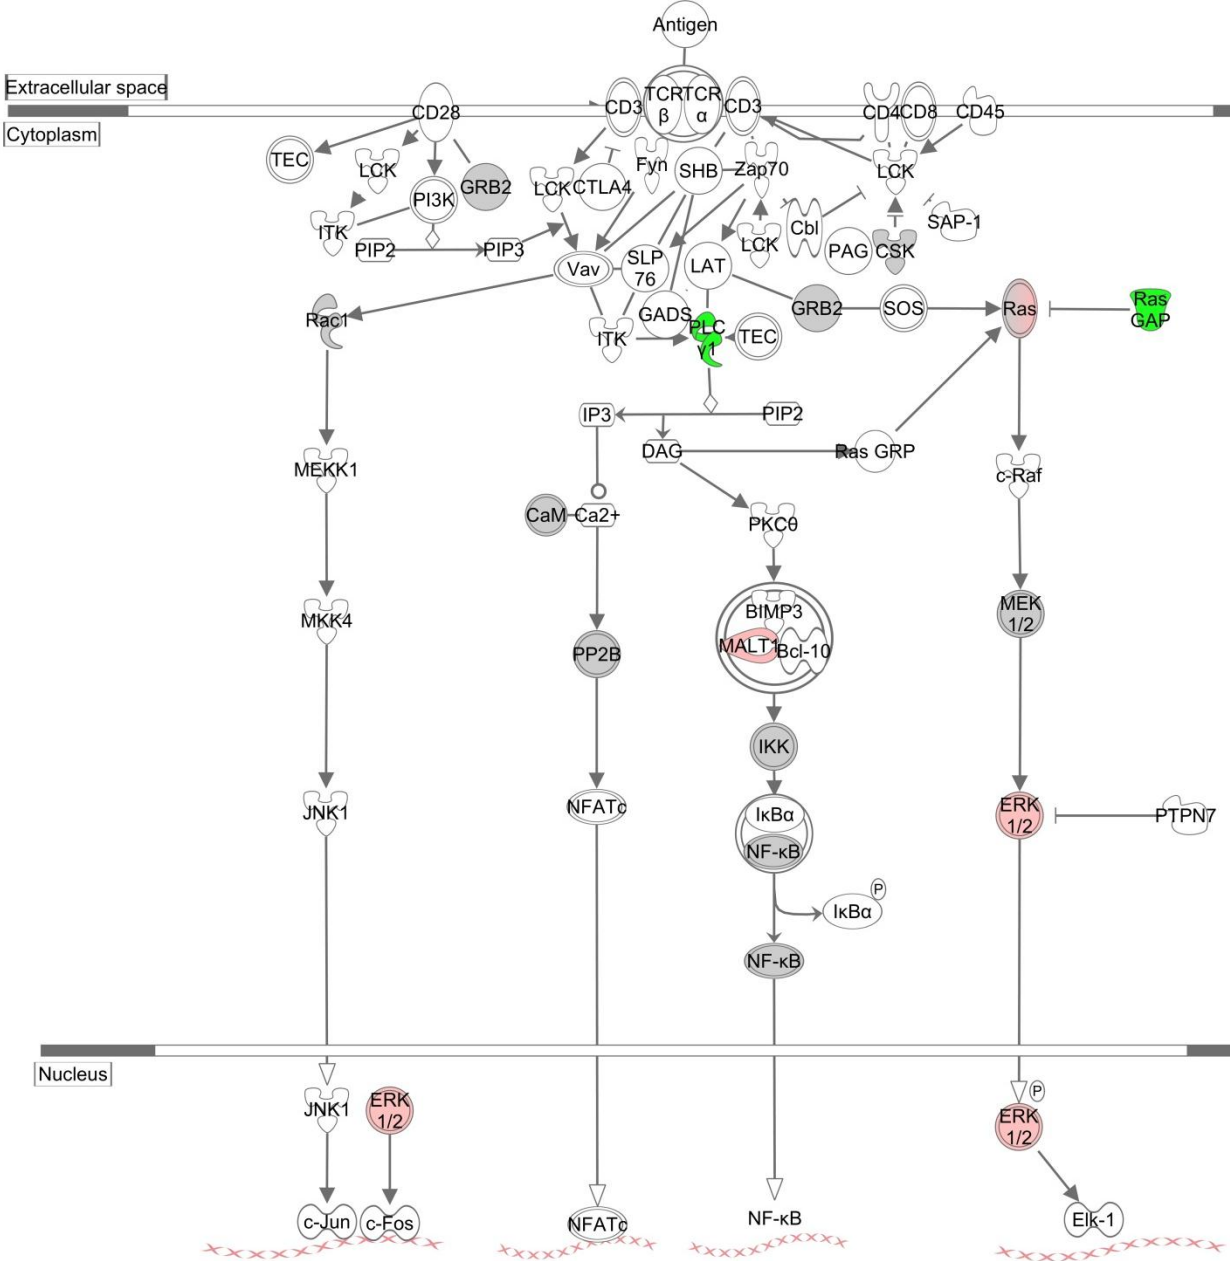

# Supplementary Figure S2-L: Activation of IRF by cytosolic pattern recognition receptors

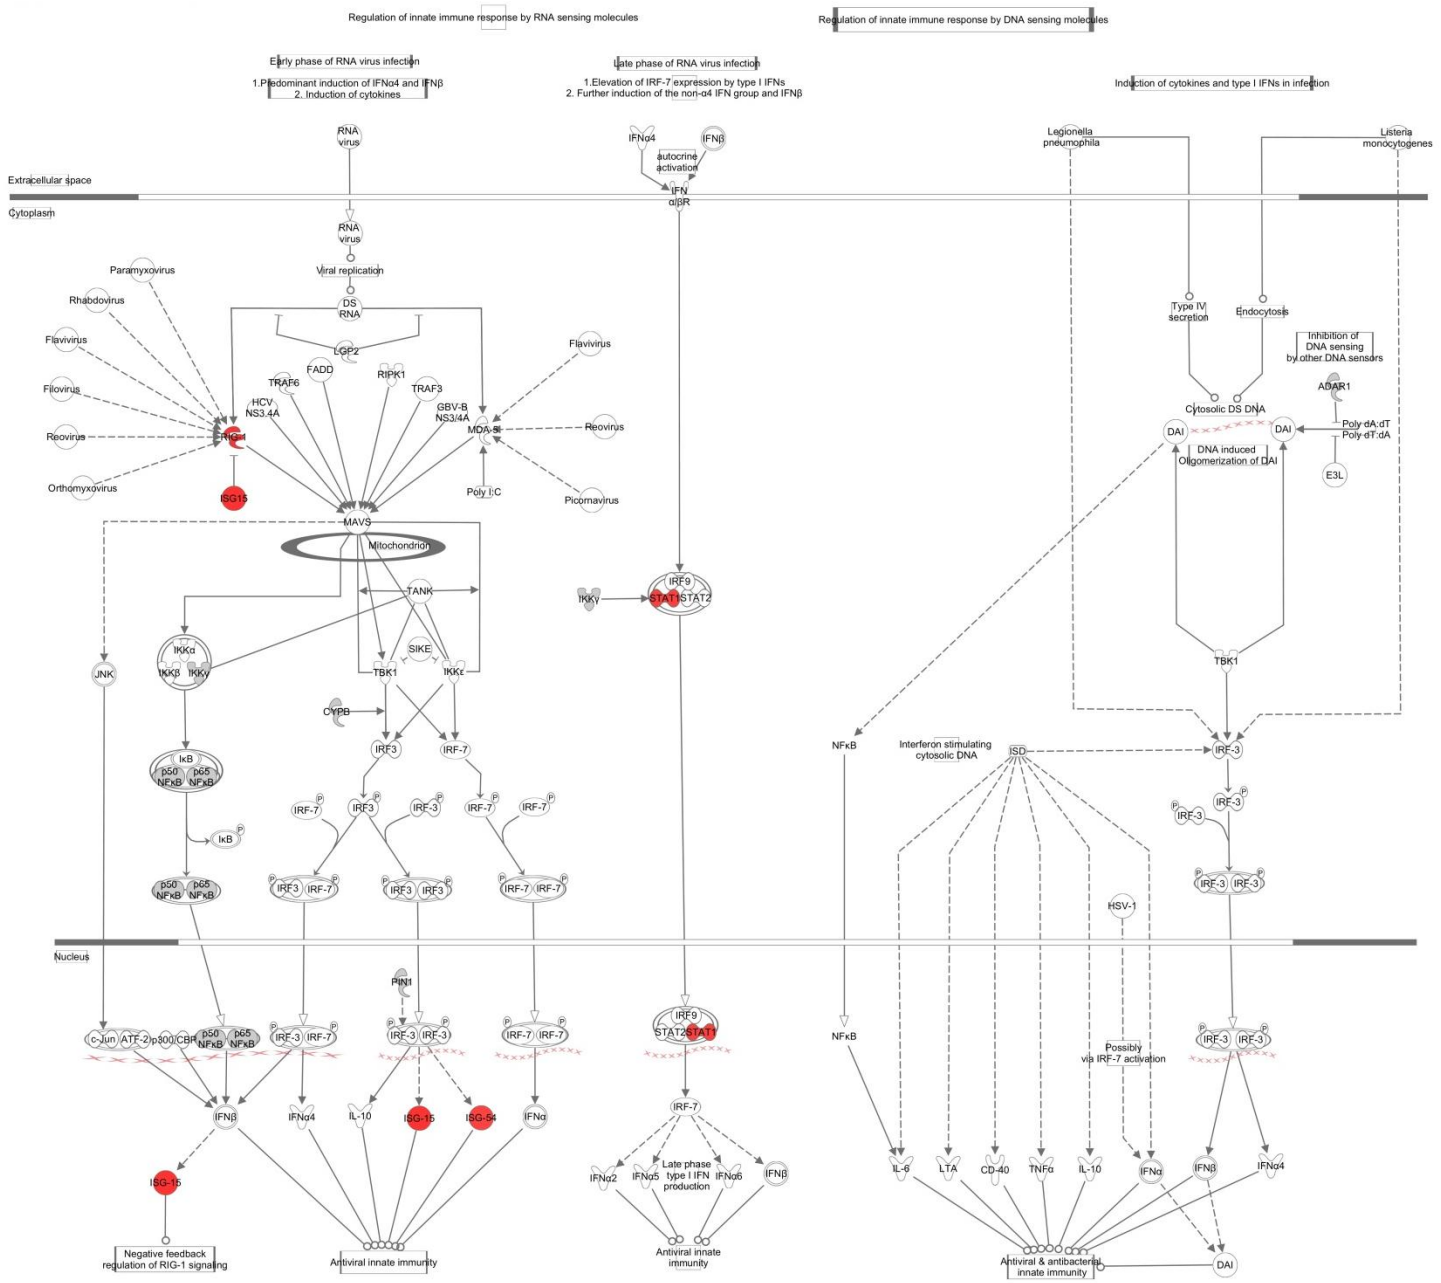

## Supplementary Figure S3

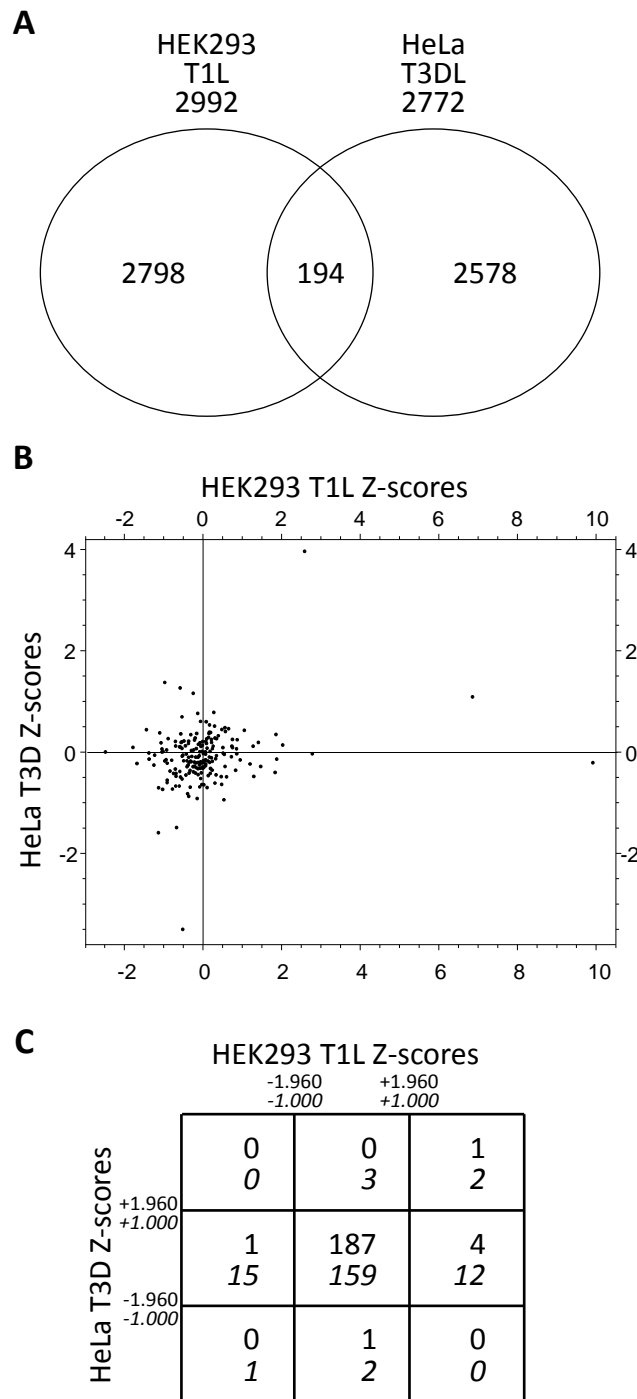

**Figure S3.** Comparison of reovirus-induced protein identifications and regulation in HEK293 cells [21] and in HeLa cells (this study). **A.** Venn diagram of numbers of identified proteins, and their overlap, from the 2 studies. **B.** Dot plot distributions of the Z-scores of each of the 194 proteins identified in both studies. **C.** Comparative distributions of regulated proteins, using Z-score category cutoffs of  $\pm 1.960$  (upper value in each cell) and  $\pm 1.000$  (lower *italicized* value in each cell). For example, 1 protein had a Z-score  $> 1.960$  in both the HEK293 and HeLa cell lists and 2 proteins had a Z-score  $> 1.000$  in both the HEK293 and HeLa cell lists.
